# Supplementary material for: Epidrug-induced upregulation of functional somatostatin type 2 receptors in human pancreatic neuroendocrine tumor cells
Source: PubMed Central journal article supplement (PMC5871078; doi:10.18632/oncotarget.9462), 2016-05-19
Supplement: oncotarget-09-14791-s001.pdf [file oncotarget-09-14791-s001.pdf]

SUPPLEMENTARY FIGURE

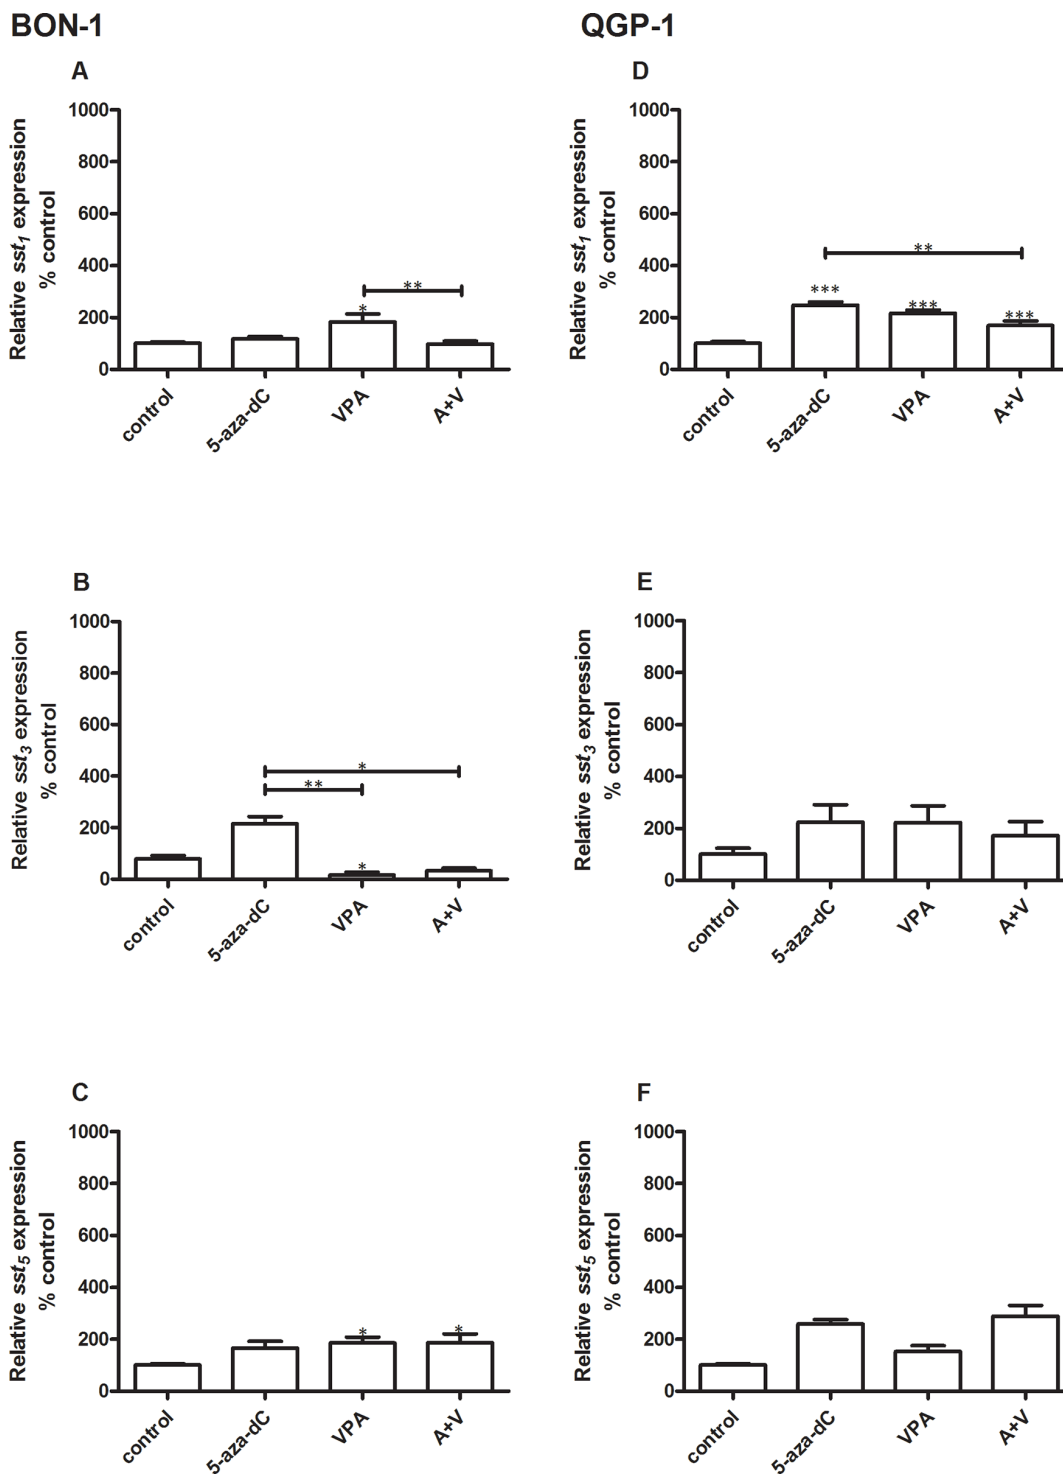

**Supplementary Figure 1: A, B, C.** effect of treatment with 5-aza-dC (100 nM), VPA (2.5 mM) or the combination of both drugs on *sst*<sub>1</sub>, *sst*<sub>3</sub> and *sst*<sub>5</sub> expression in BON-1 cells. **D, E, F.** effect of treatment with 5-aza-dC (50 nM), VPA (1 mM) or the combination of both drugs on *sst*<sub>1</sub>, *sst*<sub>3</sub> and *sst*<sub>5</sub> expression in QGP-1 cells. Data are the mean ± SEM and expressed as the percentage of untreated control cells. The expression levels were normalized to housekeeping gene *hprt*. \*p<0.05, \*\*p<0.01, \*\*\*p<0.001.
